# Supplementary figures and images for: Gestão : fluxo de alunos em uma escola de ginástica infantil
Source: eLife journal article supplement (doi:10.7554/elife.13328), 2012-01-01

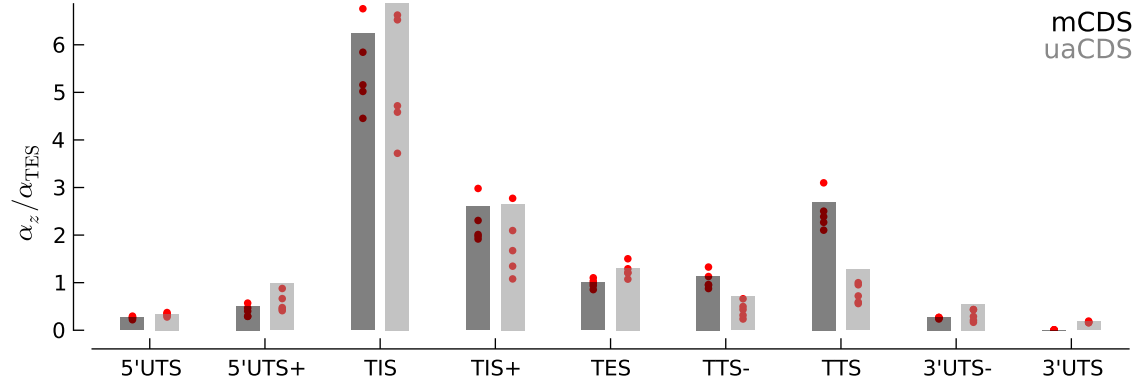

Supplement: supp [file elife-13328-supp-v1.zip]

most expressed genes

random genes

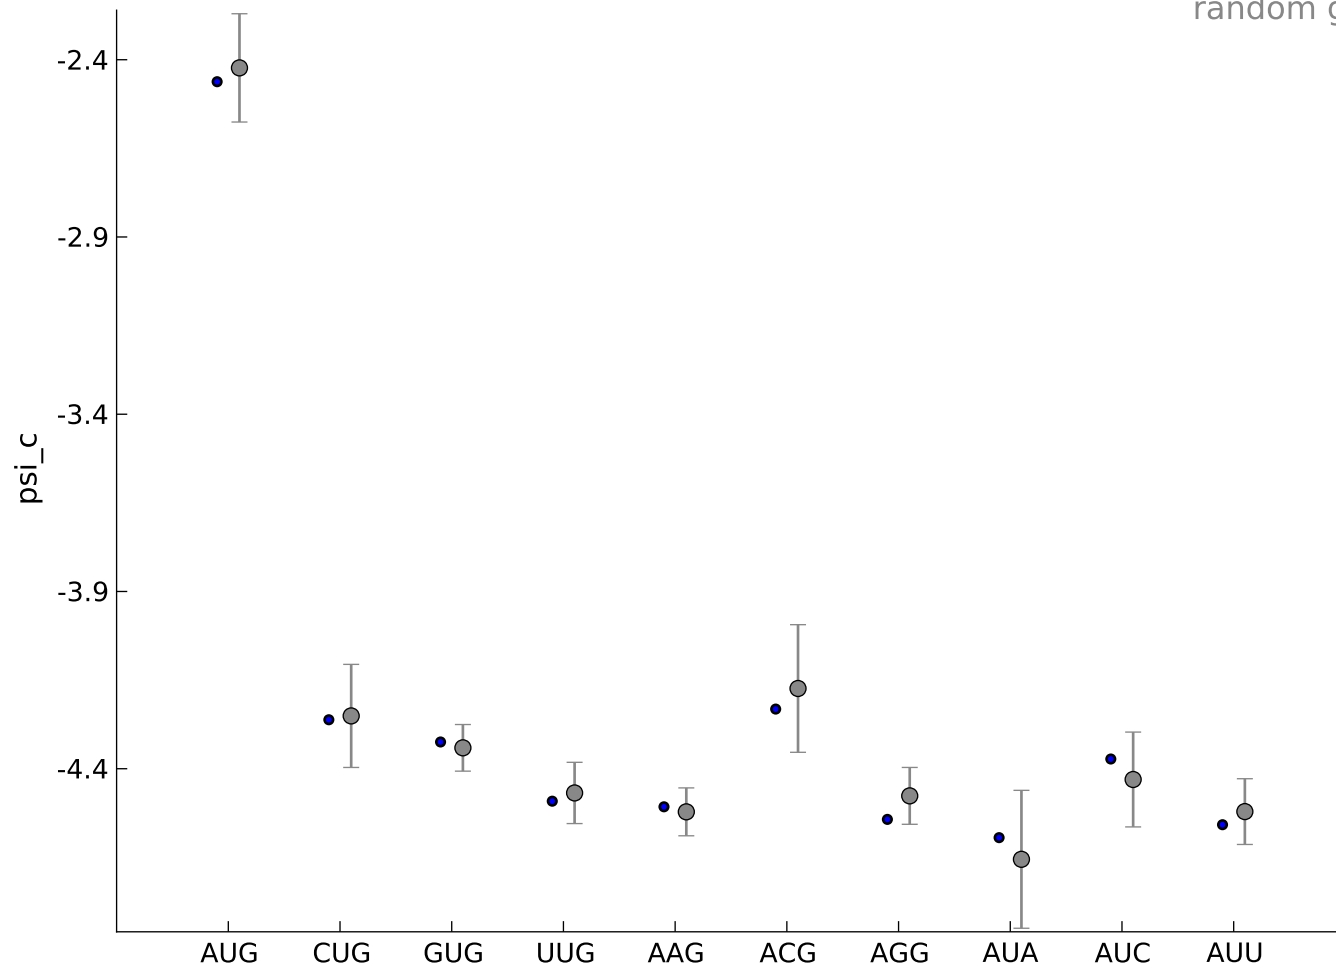

Supplement: supp [file elife-13328-supp-v1.zip]

# validation with harringtonine treatment

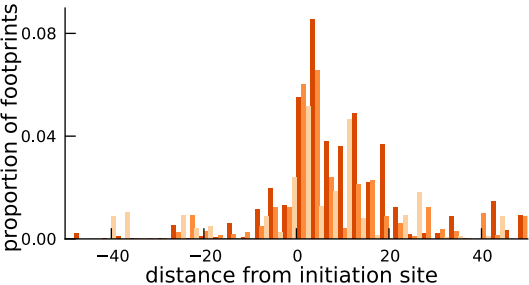

Supplement: supp [file elife-13328-supp-v1.zip]

# selection at mCDS in pseudogenes

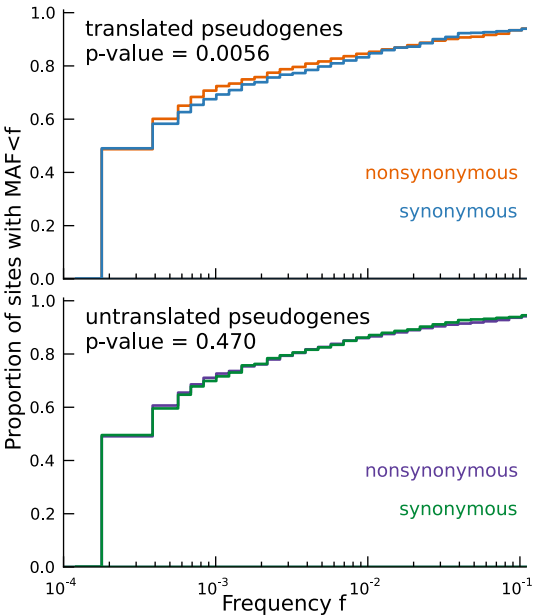

Supplement: supp [file elife-13328-supp-v1.zip]

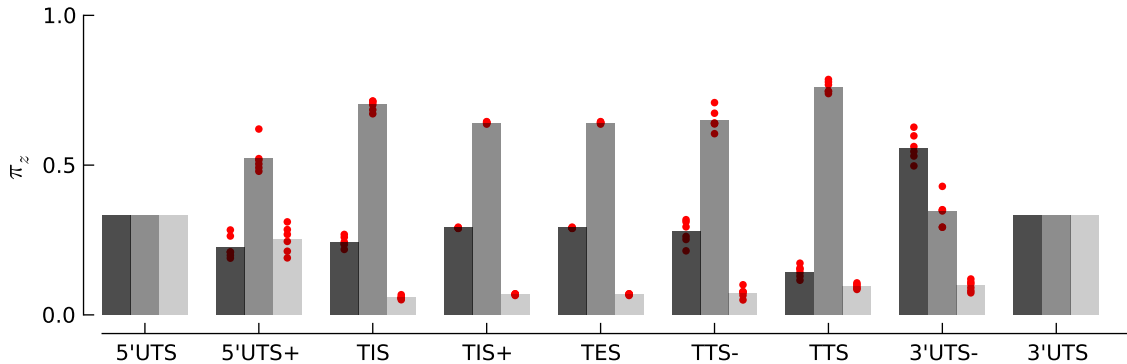

Supplement: supp [file elife-13328-supp-v1.zip]

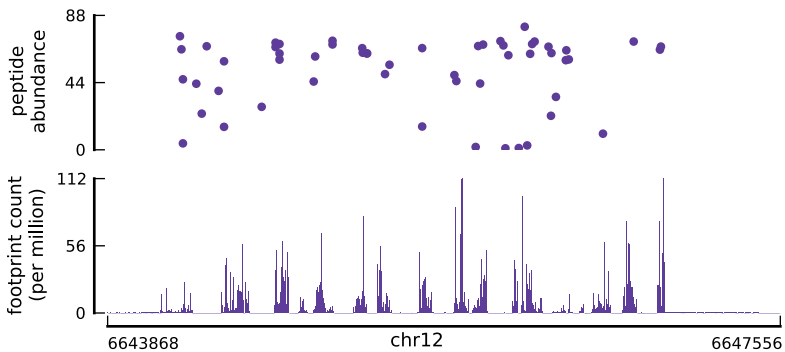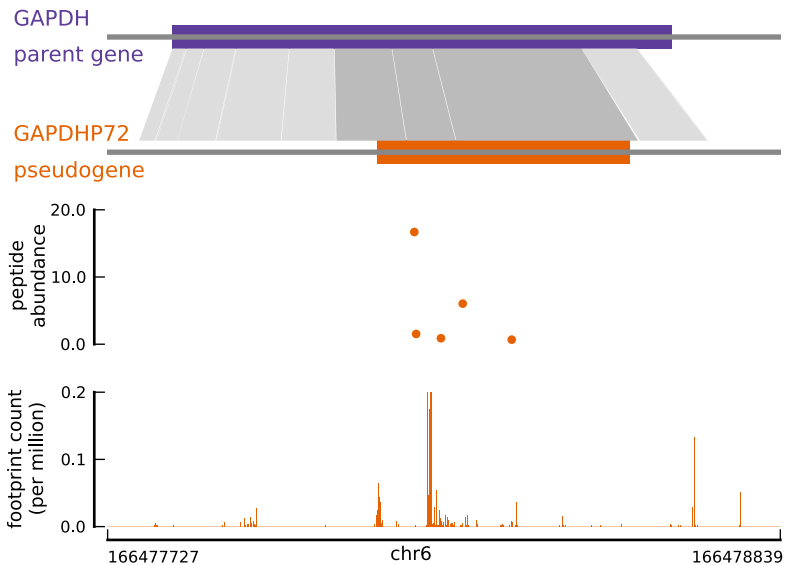

Supplement: supp [file elife-13328-supp-v1.zip]
